# Supplementary material
Source: Springer Nature journal article supplement (https://www.springermedizin.de/resource/supplementary/13018_2010_273_MOESM4_ESM.pdf/9636676)

A

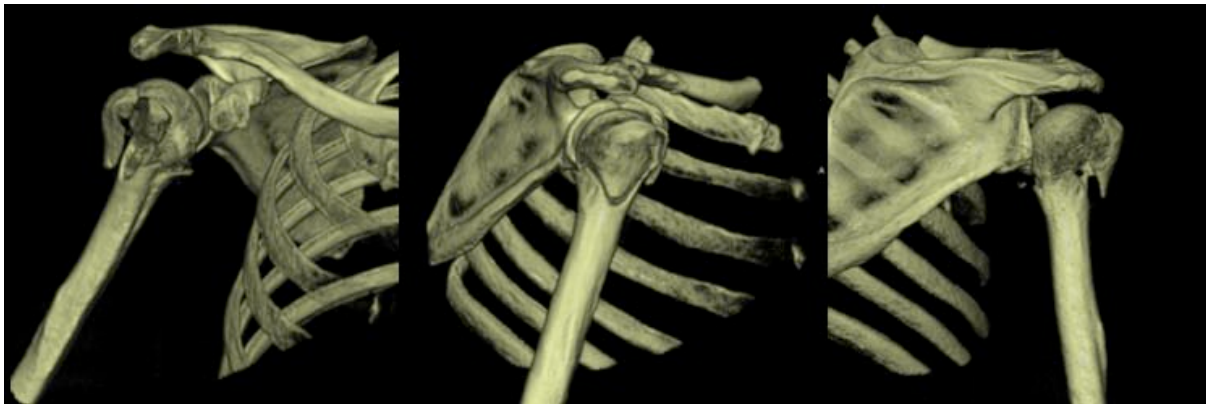

B

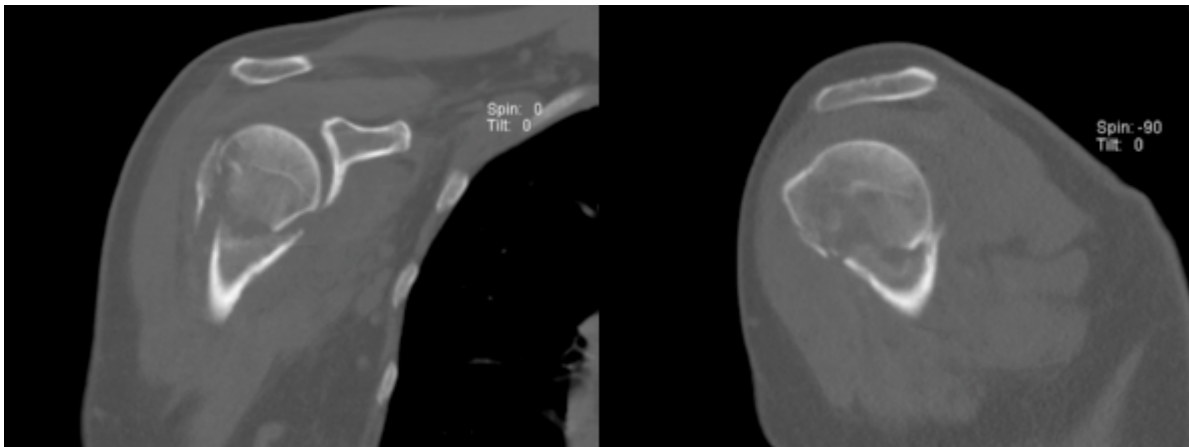

C

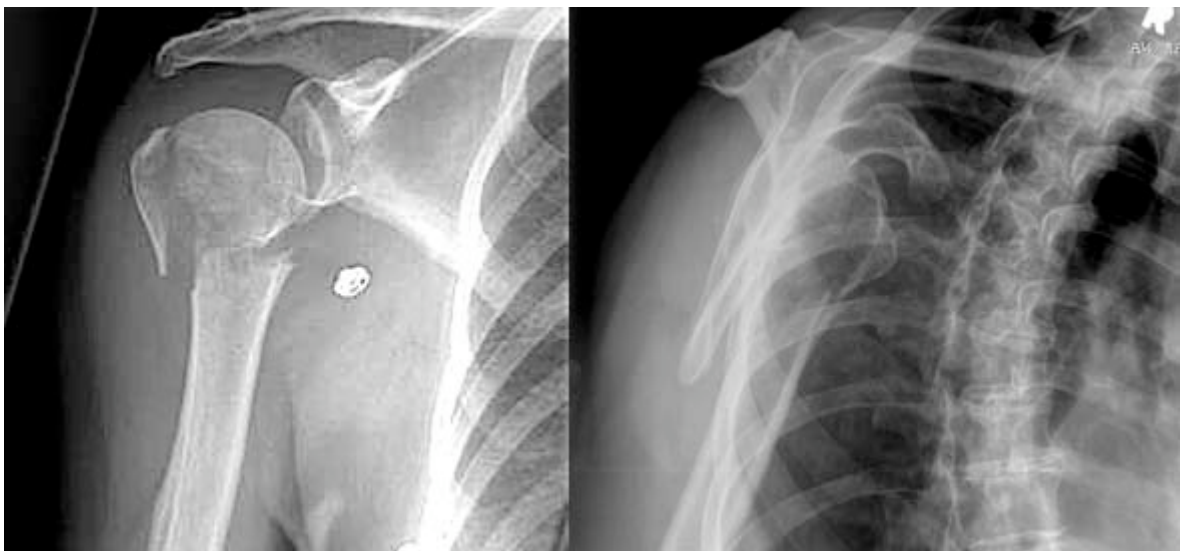

Supplement: MOESM4 [file 9636676]
